# Supplementary material for: Estimates of Effective Population Size in Commercial and Hatchery Strains of Coho Salmon (Oncorhynchus kisutch (Walbaum, 1792))
Source: MDPI journal article supplement (doi:10.3390/ani12050647), 2022-03-03
Supplement: s1 [file s1]

Table S1. Biodata of the populations used in the analysis.

| Acronym           | Generations of the breeding program | Traits selected                                     | Inbreeding management                                          |
|-------------------|-------------------------------------|-----------------------------------------------------|----------------------------------------------------------------|
| CL_1              | 15                                  | Harvest weight                                      | -                                                              |
| CL_2              | -                                   | -                                                   | -                                                              |
| CL_3              | 8                                   | Growth                                              | Avoidance of sib matings                                       |
| CL_4              | 8                                   | Growth                                              | Avoidance of sib matings                                       |
| CL_5              | 5                                   | Not known                                           | Incorporating eggs from other companies.                       |
| USA_1 (even line) | 21                                  | The selection was primarily for growth and survival | Circular matings and avoidance matings between close relatives |
| USA_1' (odd line) | 20                                  | The selection was primarily for growth and survival | Circular matings and avoidance matings between close relatives |
| WRH               | -                                   | Natural selection at the hatchery environment       | -                                                              |
| Japan             | 2                                   | Harvest weight [13]                                 | No information                                                 |
